# Supplementary material for: Adaptation, spread and transmission of SARS-CoV-2 in farmed minks and associated humans in the Netherlands
Source: PubMed Central journal article supplement (PMC8611045; doi:10.1038/s41467-021-27096-9), 2021-11-23
Supplement: 41467_2021_27096_MOESM1_ESM.pdf [file 41467_2021_27096_MOESM1_ESM.pdf]

## Supplementary tables and figures

Table S1 Estimated TMRCA, evolution rate and spatial diffusion rate of Cluster A, C and D

| Cluster | TMRCA      |                             | Last<br>sampling<br>date | Evolution.rate x10-3 |              | Diffusion.rate x10-4 |              |
|---------|------------|-----------------------------|--------------------------|----------------------|--------------|----------------------|--------------|
|         | mean       | 95% HPD                     |                          | mean                 | 95% HPD      | mean                 | 95% HPD      |
| A       | 21/03/2020 | [10/03/2020,<br>10/04/2020] | 04/11/2020               | 1.41                 | [1.20, 1.75] | 2.91                 | [2.45, 3.38] |
| C       | 28/03/2020 | [12/03/2020,<br>22/04/2020] | 03/09/2020               | 0.88                 | [0.57, 1.04] | 1.06                 | [0.81, 1.34] |
| D       | 19/04/2020 | [27/03/2020,<br>11/05/2020] | 08/08/2020               | 1.16                 | [0.77, 1.60] | 1.34                 | [0.61, 2.2]  |

Table S2 Number of significant ( $BF > 3$ ) transmissions between human and minks of Cluster A, C and D

| Cluster | host        | BF2  | median_jump | 95% HPD  |
|---------|-------------|------|-------------|----------|
|         |             |      |             | interval |
| A       | human->mink | >100 | 4           | (0, 6)   |
|         | mink->human | >100 | 27          | (22, 32) |
| C       | human->mink | >100 | 1           | (0, 1)   |
|         | mink->human | >100 | 10          | (7, 12)  |
| D       | human->mink | >100 | 0           | (0, 1)   |
|         | mink->human | >100 | 6           | (5, 6)   |

Table S3 Number of significant (BF>3) transmissions between farms

| Cluster | farm       | BF        | median_jump | 95% HPD interval |
|---------|------------|-----------|-------------|------------------|
| A       | NB1->NB3   | (30,100]  | 1           | (0, 2)           |
|         | NB1->NB4   | (10,30]   | 1           | (0, 2)           |
|         | NB1->NB8   | (10,30]   | 1           | (0, 2)           |
|         | NB13->NB16 | (30,100]  | 1           | (0, 2)           |
|         | NB13->NB20 | (100,Inf] | 2           | (1, 4)           |
|         | NB13->NB21 | (10,30]   | 1           | (0, 2)           |
|         | NB21->NB27 | (10,30]   | 1           | (0, 2)           |
|         | NB21->NB38 | (10,30]   | 1           | (0, 2)           |
|         | NB33->NB35 | (100,Inf] | 1           | (0, 5)           |
|         | NB35->NB33 | (100,Inf] | 3           | (0, 6)           |
|         | NB35->NB36 | (30,100]  | 4           | (0, 7)           |
|         | NB36->NB35 | (30,100]  | 1           | (0, 4)           |
|         | NB46->NB47 | (30,100]  | 1           | (0, 7)           |
|         | NB47->NB43 | (30,100]  | 3           | (0, 5)           |
|         | NB47->NB46 | (30,100]  | 3           | (0, 6)           |
|         | NB47->NB48 | (10,30]   | 1           | (0, 2)           |
|         | NB47->NB49 | (10,30]   | 3           | (0, 6)           |
|         | NB47->NB50 | (3,10]    | 2           | (0, 3)           |
|         | NB47->NB51 | (10,30]   | 1           | (0, 2)           |
|         | NB47->NB52 | (10,30]   | 3           | (0, 7)           |
|         | NB50->NB53 | (3,10]    | 2           | (1, 3)           |
|         | NB52->NB56 | (10,30]   | 3           | (0, 6)           |
|         | NB54->NB56 | (100,Inf] | 1           | (0, 5)           |
|         | NB55->NB62 | (30,100]  | 1           | (0, 2)           |
|         | NB55->NB64 | (10,30]   | 1           | (0, 2)           |

|   |                          |           |   |        |
|---|--------------------------|-----------|---|--------|
|   | NB56->NB54               | (100,Inf] | 2 | (0, 4) |
|   | NB56->NB61               | (30,100]  | 1 | (0, 4) |
|   | NB56->NB63               | (10,30]   | 2 | (0, 6) |
|   | NB57->NB58               | (100,Inf] | 5 | (0, 7) |
|   | NB57->NB60               | (100,Inf] | 4 | (0, 6) |
|   | NB58->NB57               | (100,Inf] | 1 | (0, 5) |
|   | NB58->NB65               | (10,30]   | 1 | (0, 2) |
|   | NB58->unrelate-<br>human | (3,10]    | 1 | (0, 2) |
|   | NB61->NB59               | (3,10]    | 1 | (0, 4) |
|   | NB62->NB67               | (100,Inf] | 1 | (1, 2) |
|   | NB63->NB64               | (30,100]  | 3 | (0, 5) |
|   | NB65->unrelate-<br>mink  | (100,Inf] | 1 | (1, 1) |
|   | NB8->NB12                | (100,Inf] | 3 | (1, 5) |
|   | <hr/>                    |           |   |        |
| C | NB14->NB24               | (10,30]   | 1 | (0, 1) |
|   | NB17->NB23               | (100,Inf] | 3 | (1, 5) |
|   | NB17->unrelate-<br>human | (30,100]  | 1 | (0, 1) |
|   | NB7->NB31                | (10,30]   | 1 | (0, 1) |
|   | NB29->NB32               | (100,Inf] | 1 | (0, 5) |
|   | NB32->NB34               | (100,Inf] | 2 | (0, 5) |
|   | NB32->NB39               | (10,30]   | 1 | (0, 4) |
|   | NB32->NB41               | (10,30]   | 1 | (0, 2) |
|   | NB6->NB9                 | (10,30]   | 1 | (0, 3) |
|   | <hr/>                    |           |   |        |
| D | NB15->NB18               | >100      | 3 | (0, 3) |
|   | NB15->NB19               | (3,10]    | 1 | (0, 2) |
|   | NB18->NB19               | >100      | 1 | (0, 2) |
|   | NB19->NB25               | (30,100]  | 1 | (0, 2) |

|  |            |          |   |        |
|--|------------|----------|---|--------|
|  | NB25->NB28 | (30,100] | 1 | (0, 2) |
|--|------------|----------|---|--------|

Table S4 The contribution of predictors of Cluster C and D transmissions between mink farms

| Cluster                            | Predictor                                     | Coefficient            | 95% HPD interval | Inclusion Prob | Coefficient*Indicator |   |
|------------------------------------|-----------------------------------------------|------------------------|------------------|----------------|-----------------------|---|
| C                                  | distance between farms                        | -0.24                  | [-3.45, 3.67]    | 0.38           | -0.09                 |   |
|                                    | personnel links                               | 0.01                   | [-3.79, 3.86]    | 0.04           | 0                     |   |
|                                    | feed supplier                                 | -0.01                  | [-4.01, 3.85]    | 0.01           | 0                     |   |
|                                    | veterinary service provider                   | 0.02                   | [-3.855, 3.9941] | 0.02           | 0                     |   |
|                                    | mink population of the origin                 | 0.08                   | [-4.08, 3.87]    | 0.03           | 0.002                 |   |
|                                    | mink population of the destination            | -0.01                  | [-3.84, 3.94]    | 0.06           | -0.001                |   |
|                                    | sample size of the origin                     | -0.02                  | [-3.88, 3.76]    | 0.01           | 0                     |   |
|                                    | sample size of the destination                | -0.01                  | [-3.96, 3.88]    | 0.01           | 0                     |   |
|                                    | human density of origin                       | 0.03                   | [-3.93, 3.87]    | 0.01           | 0                     |   |
|                                    | human density of destination                  | -0.002                 | [-3.89, 3.97]    | 0.01           | 0                     |   |
|                                    | days between sampling and culling origin      | 0.10                   | [-3.76, 3.88]    | 0              | 0                     |   |
|                                    | days between sampling and culling destination | -0.01                  | [-3.77, 4.08]    | 0              | 0                     |   |
|                                    | D                                             | distance between farms | 0.01             | [-3.77, 3.92]  | 0.01                  | 0 |
|                                    |                                               | personnel links        | 0.02             | [-4.04, 3.76]  | 0.01                  | 0 |
| feed supplier                      |                                               | 0                      | [-4.01, 3.81]    | 0              | 0                     |   |
| veterinary service provider        |                                               | -0.02                  | [-3.72, 3.99]    | 0              | 0                     |   |
| mink population of the origin      |                                               | 0.02                   | [-3.54, 4.17]    | 0              | 0                     |   |
| mink population of the destination |                                               | 0.01                   | [-4.07, 3.75]    | 0              | 0                     |   |
| sample size of the origin          |                                               | 0.20                   | [-3.86, 4.02]    | 0.07           | 0.014                 |   |
| sample size of the destination     |                                               | -0.01                  | [-3.89, 3.74]    | 0.00           | 0                     |   |
| human density of origin            |                                               | 0.12                   | [-3.78, 4.05]    | 0.06           | 0.01                  |   |

|                                                  |       |               |      |   |
|--------------------------------------------------|-------|---------------|------|---|
| human density of destination                     | -0.01 | [-3.74, 4.03] | 0.01 | 0 |
| days between sampling and culling<br>origin      | 0.03  | [-3.90, 3.82] | 0.01 | 0 |
| days between sampling and culling<br>destination | -0.01 | [-3.89, 3.80] | 0    | 0 |

---

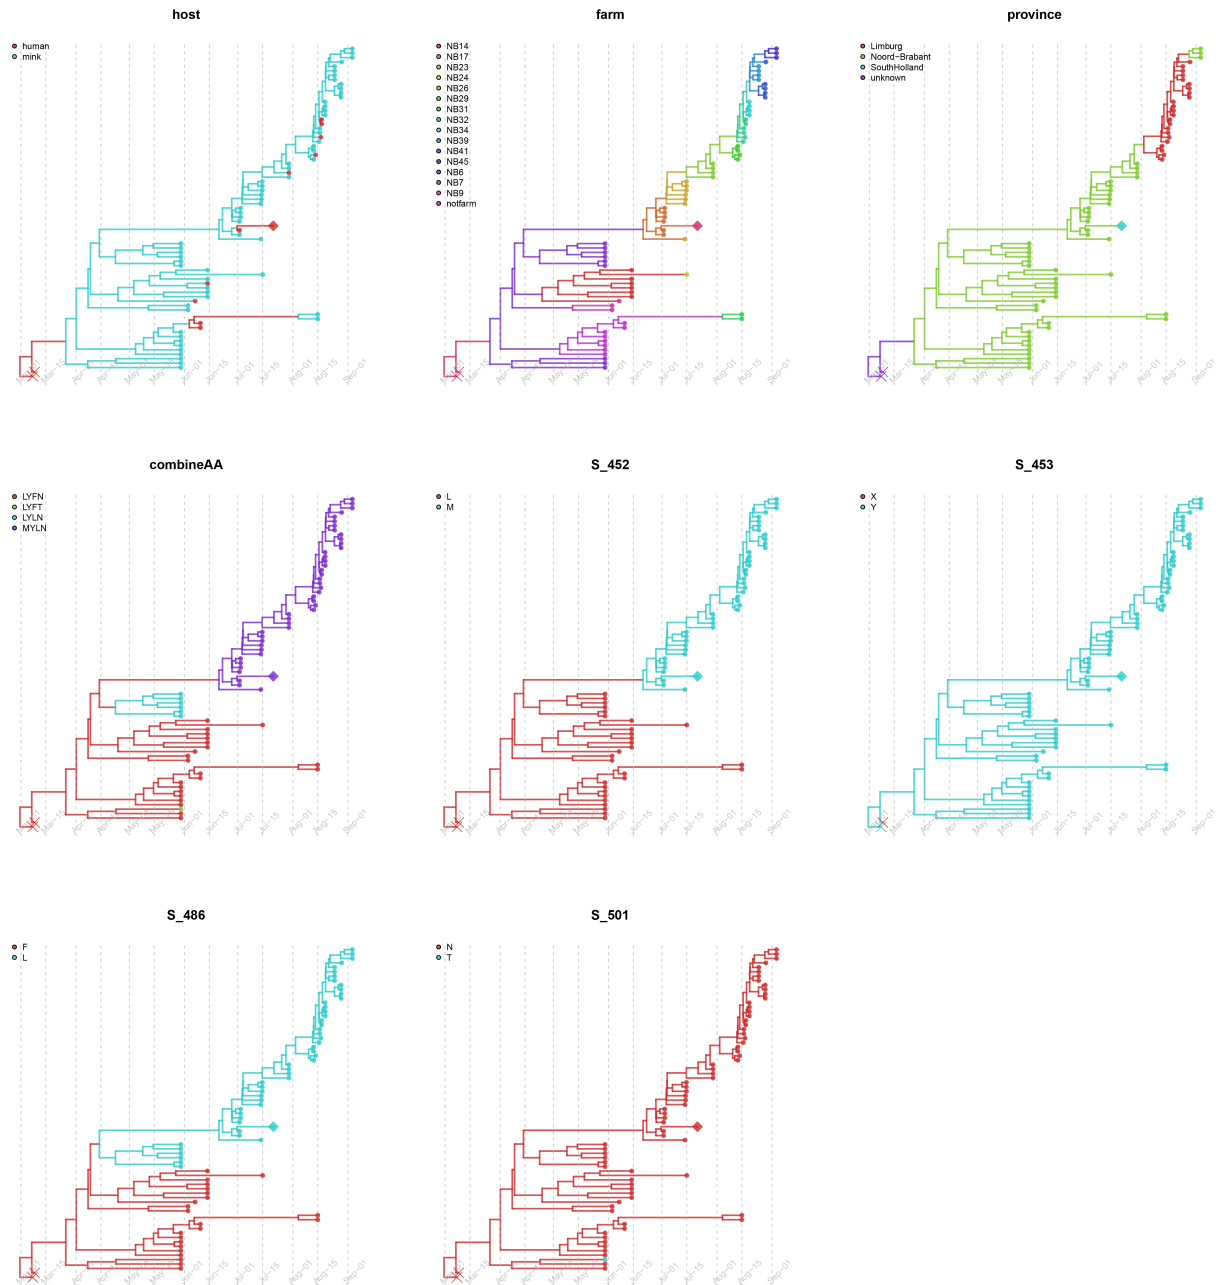

Figure S1. Discrete trait mapping on time-scaled phylogeny of Cluster C. Eight traits including host, farm ID (farm), province, the 4 unique sites in the spike protein with amino acid changes (L452M, Y453F, F486L and N501T) and the combinations of the 4 sites (combineAA) are mapped on the same MCC tree using the discrete trait model. The traits are plotted individually and for each tree, the branches and nodes are colored by inferred ancestral traits. Samples which fell within mink clusters but not isolated from farms are highlighted in diamond (1 escaped mink and 1 un-associated human sequences). The outgroup containing human samples are cross labelled.

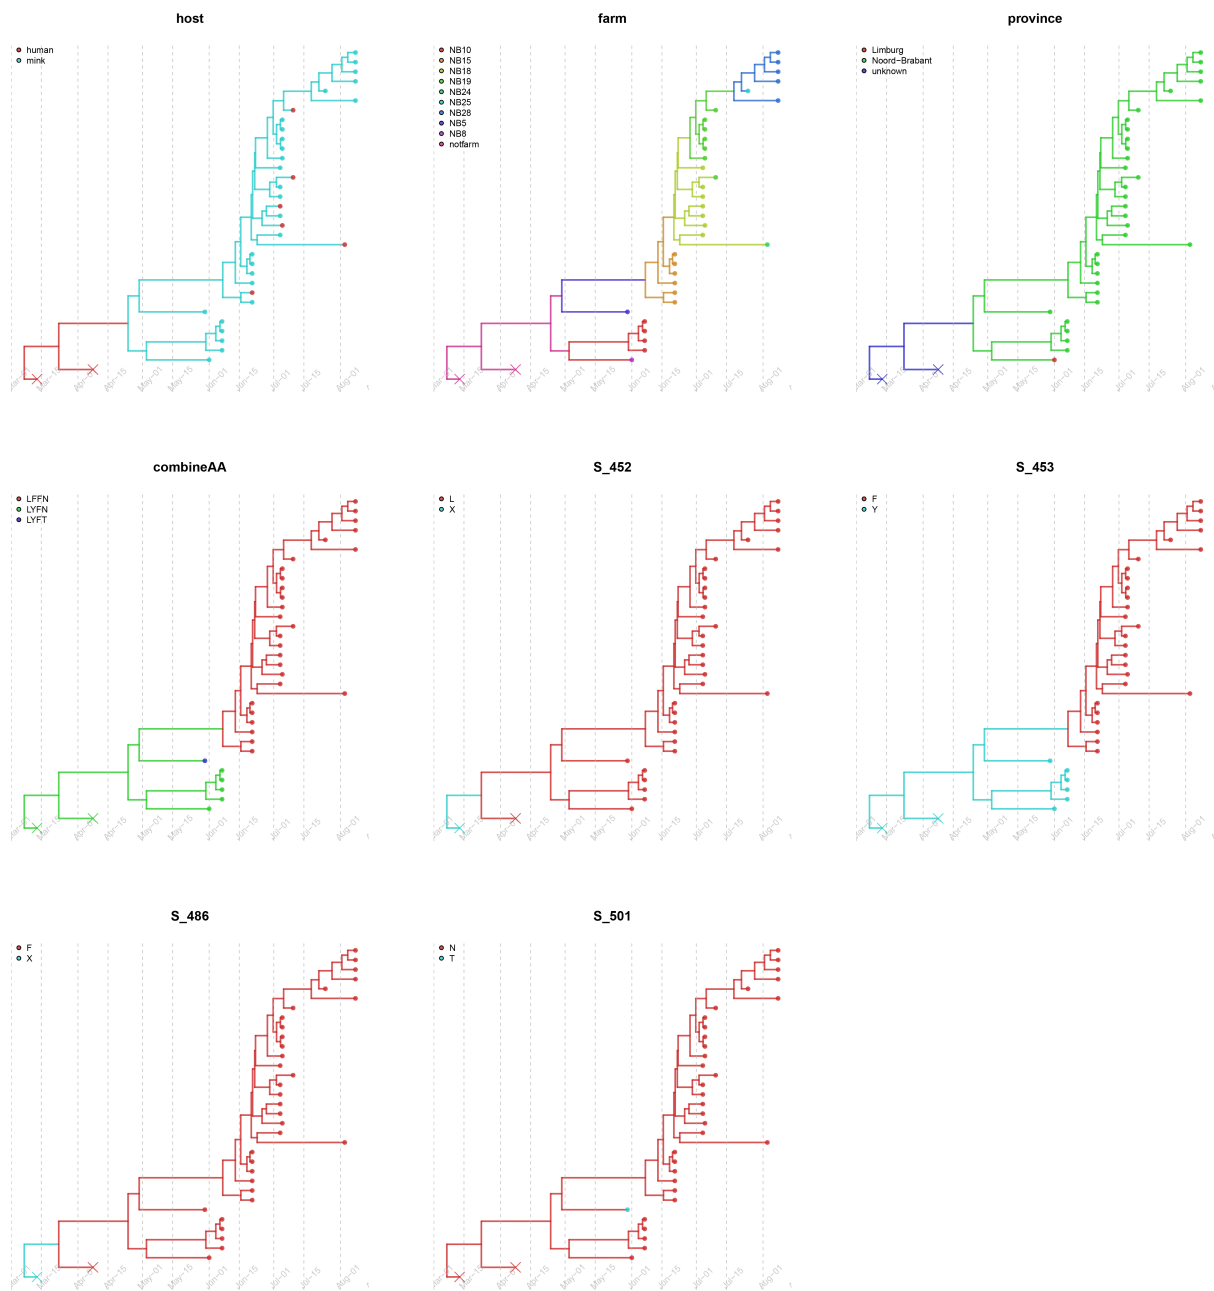

Figure S2. Discrete trait mapping on time-scaled phylogeny of Cluster D. Eight traits including host, farm ID (farm), province, the 4 unique sites in the spike protein with amino acid changes (L452M, Y453F, F486L and N501T) and the combinations of the 4 sites (combineAA) are mapped on the same MCC tree using the discrete trait model. The traits are plotted individually and for each tree, the branches and nodes are colored by inferred ancestral traits. Samples which fell within mink clusters but not isolated from farms are highlighted in diamond (1 escaped mink and 1 un-associated human sequences). The outgroup containing human samples are cross labelled.

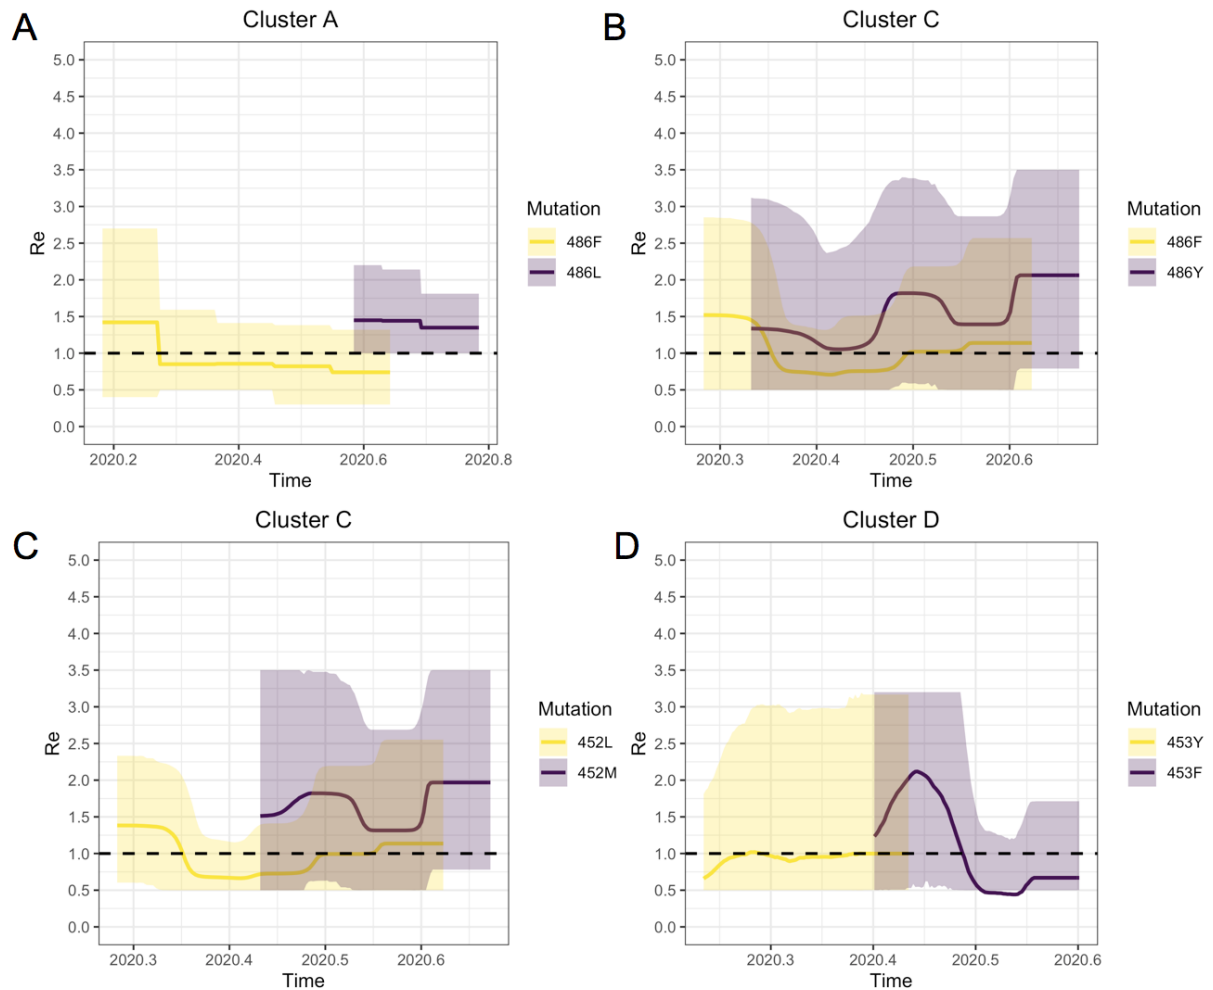

Figure S3 Multitype birth-death (BDMM) analysis of impact of appearance of mutations on Spike on reproductive number over time. For Cluster A, C and D, the changes in the  $R_e$  for clades with amino acid changes on Spike protein site 486, 452 and 453 are shown in purple, clades without changes are shown in yellow. The shaded portion is the 95% HPD interval, and the solid line is the posterior median. Horizontal dashed line is  $R_e=1$ .



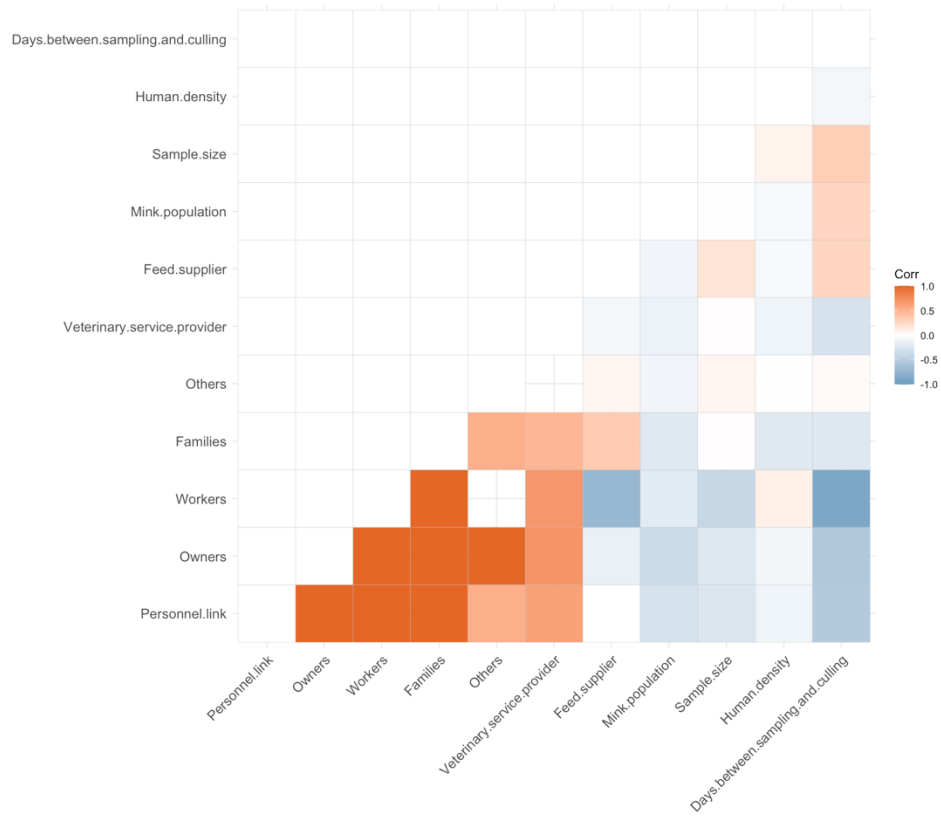

Figure S4 Correlation matrix between the predictor data collected from mink farms. The color corresponding to the correlation coefficient. Dark blue indicates strong positive correlation whereas dark red indicates strong negative correlation. Highly correlated predictors (sharing owners, sharing employees, owned by other members of the same family, or other links) were omitted.

## **Supporting files**

Supplementary Data 1. SARS-Cov-2 sequences isolated from minks and humans used in the phylogenetic analysis. Metadata include Virus.name, GISAID Accession ID, Cluster number, Host, Farm ID, Collect Date, Amino acid substitutions in Spike protein.

Supplementary Data 2. The epidemiology metadata of mink farm NB1-68. Metadata include Farm ID, Epi-week, Mink cluster, Province, Human density (per sq km per town), Number of isolated sequences, Mink population, Days until final culling, Code for veterinary practice, feed company and personnel links.
